# Supplementary material for: ATP hydrolytic activity of purified Spf1p correlate with micellar lipid fluidity and is dependent on conserved residues in transmembrane helix M1
Source: PubMed Central journal article supplement (PMC9584430; doi:10.1371/journal.pone.0274908), 2022-10-20

Original Uncropped gels for fig 4:

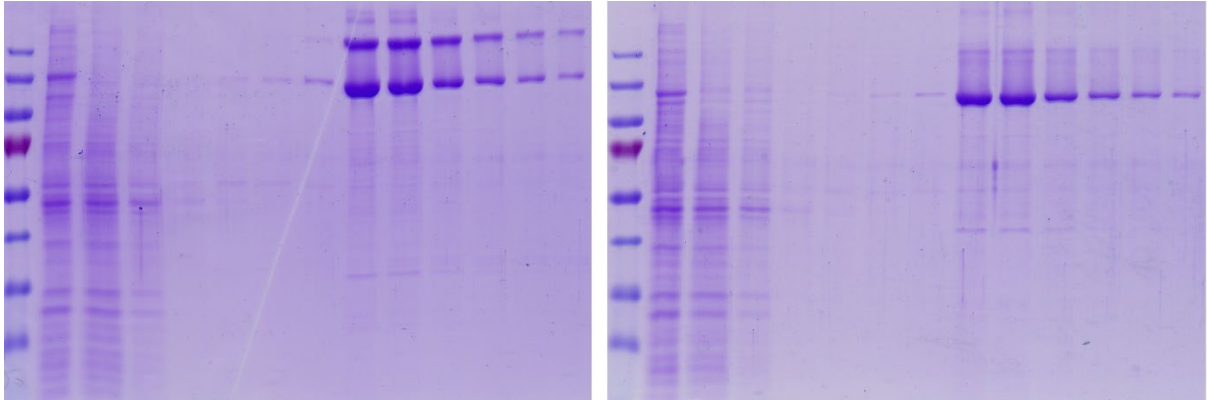

Original Uncropped gels for fig 5E:

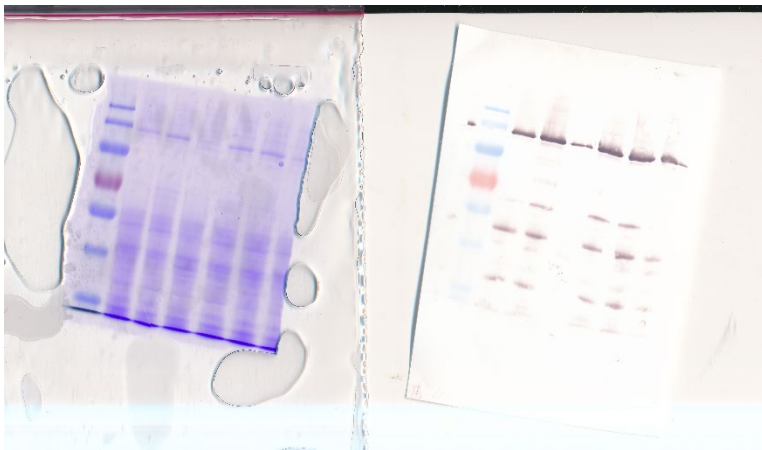

Original Uncropped gels for fig 5F:

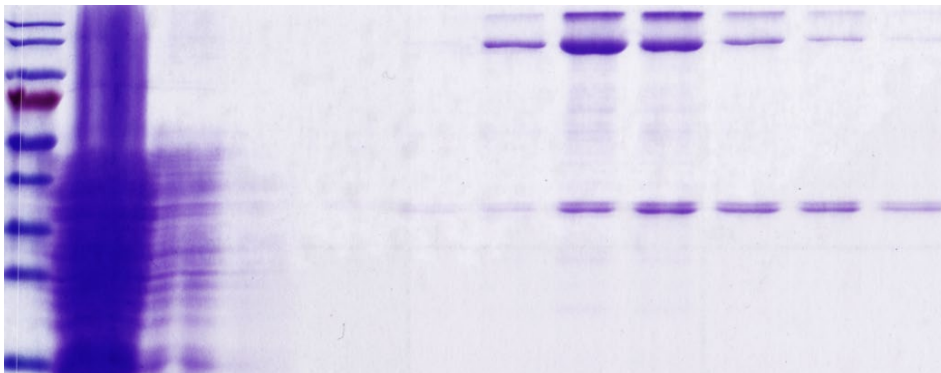

Supplement: pone.0274908.s002.pdf [file pone.0274908.s002.pdf]
